# Supplementary material
Source: publisher site journal article supplement (https://www.dovepress.com/article/422516)
Supplement: Supplementary file 1 [file get_supplementary_file.php]

**Activities**

**Output**

**Outcome**

**Impact**

**Input**

Improved knowledge and practice of HCPs

Trained and supervised personnel

Training and supportive supervision for VCT personnel

Human Resources (Trained Personnel)

Test Kits and associated Supplies (Gloves, Lancets, Alcohol Swabs, etc)

HIV Guidelines, Protocols, and Manuals

Data recording and reporting tools

IEC/BCC Materials (Posters, Brochures, etc)

Clients received pretest counseling

Improved in care, prevention and Rx services for VCT client

Provide pretest counseling

Clients know their HIV status

Provide HIV testing

Reduction in HIV/AIDS related morbidity and mortality

Increased VCT service utilization

Improved risk reduction behavior

Increase client satisfaction

Clients received posttest counseling

Provide posttest counseling

HIV+ clients refereed to appropriate services

Link/refer HIV+ clients to appropriate service

Improved health outcome of HIV+ clients

#### Supplementary Figure 1: Logic Model of Voluntary Counseling and Testing (VCT) Program in Akaki-Kality sub-city Addis Ababa Ethiopia in 2021

Improved quality of data and continuity of care

Client records maintained

Maintaining client records

Complete reporting

Completely and timely produced reports

**Supplementary Table 1: Stakeholder analysis matrix for process evaluation of Voluntary counseling and testing service public health facilities of Akaki Kality sub-city, Addis Ababa, Ethiopia, 2021**

| **Stakeholders** | **Role in program** | **Role in evaluation** | **Interest/perspective in evaluation** | **Means of communication** |
| --- | --- | --- | --- | --- |
| Addis Ababa Health bureau | planning, resource allocation, supportive supervision, monitoring and evaluation | Source of information, describing the program assign weight for indicator and Set judgment matrix | Use evaluation findings for planning and to support the service | Telephone, face to face |
| Addis Ababa HIV/AIDS Prevention and Control Office | Planning and implementation of the program, decision maker | Source of data ,involved in developing evaluation question, selection of indicators and setting judgment criteria | Use of findings for planning, program improvement and to learn from experiance | Telephone  Email |
| Akaki Kality sub-city health administration office | Planning and implementation of the program, resource allocation and M&E | Source of data ,selection of indicators , Facilitate evaluation process | Use the result for planning, identify strength and gap in VCT implementation | Face to face  Email, phone |
| Health facility(health center and hospital) | Plan and operate the program at facility level, conduct all VCT related activities | Data source, Defining indicators ,Problem identification | Using the evaluation results and acting up on it for program improvement | Face to face |
| Program clients | Service utilization | Source of data for evaluation | To receive improved service | Face to face interviewee |
| Health care providers | Providing the service | Provide information, help in facilitation of data collection | To know their skill gaps and update knowledge | Face to face |
| CDC | Technical and material support and supervision | Provide information on the program resources and activities | Utilization of findings and recommendation of the evaluation for program improvement | Email  Phone |
